# Supplementary material
Source: MDPI journal article supplement (https://www.mdpi.com/2071-1050/11/1/117)
Supplement: s1 [file s1]

Article

# Pastures and Cash Crops: Biomass Flows in the Socio-metabolic Transition of Twentieth-Century Colombian Agriculture

Alexander Urrego-Mesa <sup>1\*</sup>, Juan Infante-Amate <sup>2</sup> and Enric Tello <sup>1</sup>

<sup>1</sup> Department of Economic History, Institutions, Policy and World Economy, University of Barcelona, Barcelona 08034, Spain; alex.urrego.mesa@ub.edu, tello@ub.edu

<sup>2</sup> Agro-ecosystems History Laboratory, Pablo de Olavide University, Sevilla 41013, Spain, jinfama@upo.es

\* Correspondence: alex.urrego.mesa@ub.edu; Tel.: +34-93 402 19 31

## 1. Summary

This supplementary document aims to introduce the whole data used in the elaboration of the article. In the second section, we describe the sources and procedures applied to figure missing values for crop production and harvested area. Additionally, we provide details for the most important crops: maize, sugarcane, and coffee. In the third section, we present the scientific literature to estimate the harvest index, root-shoot ratio, weeds in traditional, low-input and conventional agricultural systems, and NPP for pastures and tropical forest. The fourth section is devoted to forest and pasture covers; we show the data on pasture, cattle and cattle density employed to estimate pastureland and discuss the available data for permanent pastures, meadows and shrubland. Regarding forest, the annual rates of change in clearing are presented. The fifth section describes the methodological procedure to estimate the average weight and the nutritional requirements of the livestock, including a sensitivity analysis of the animal feed requirements and the biomass extracted. Finally, we show the series of NPP, extraction and uses resulting from our research.

The dataset is part of a broader project on the physical analysis of Colombian agriculture in the long-run, aimed to appraise the evolution the sustainability, the energetic efficiency and socio-ecological impact of the agricultural transition during the twentieth century in the country. The primary goal of the project is to place the experience of a peripheral country into the socio-metabolic transition of western agriculture. This research is funded by the projects “Sustainable Farm Systems: Long-Term Socio-Ecological Metabolism in Western Agriculture” (Canadian Social Sciences and Humanities Research Council Partnership Grant 895-2011-1020), and “Sustainable Farm Systems and Transitions in Agricultural Metabolism” (Spanish Ministry of Science grant HAR2012-38920-C02-02) which has also funded the cost of this publication in Open Access.

## 2. Crops Production and Crop Area Missing Values

Before 1961 there is information at the national level, but not all years are available. Kalmanovitz et al. [1] provide annual production series for twelve crops, namely: maize, wheat, barley, rice, potatoes, beans, tobacco, sugar cane, cocoa, banana, and coffee. We contrast these series with data on production and area from other national sources for 1915, 1925, 1928–1930, 1932–1946, 1948–1950, with yields from other countries in the region (see section 2.2 in the text) and introduce some modifications accordingly. Moreover, we add information for cassava, coconuts, agave, cotton, fifteen vegetables, and one aggregate category for fruits other than banana and plantain. Regarding the area in 1915, we adjust the data from the Yearbook [2] according to the production data from Kalmanovitz et al. [1]. Missing years, both in production and area, were estimated employing linear interpolation or assuming steady yields. In the case of vegetables, the figures follow from the per capita production of 1961 for each crop. As for fruits, we have used total fruit supply from FAO in 1935-39 and 1946 [3], except for banana and plantain, to obtain per capita supply. The ratio and the population series [4] were used by periods to figure the fruit production. We describe the cases of

maize, sugar cane, and coffee below, as they are the most relevant crops concerning their physical and economic weight.

### 2.1. Maize

In the case of maize, the data of Kalmanovitz et al. [1] exceeds by a factor of two the production of the Yearbook in 1915 and Wylie, K. H.'s [5] estimates for 1925–1928, but the difference with the Yearbooks disappears after the 1930s (Figure S1 (a)). When we cross production data from Kalmanovitz et al. [1] with the available for the area (Figure S1 (b)), the difference entails yields higher than 1500 kg/h and even 2000 kg/h (Figure S2 (a)). By contrast, the yields obtained with the data from Wylie, K. H. [5] are consistent with the yields in 1932–1940 (800–1000 kg/h) and with those of countries like Ecuador (1280 kg/h between 1938–1942) [6], Cuba (916 kg/h in 1945) [7], or Venezuela (1000 kg/h in 1949) [8].

These differences could derive either from the occultation of the harvested area or the overestimation of production in the series by Kalmanovitz et al. [1], but we are unable to identify which one of them is behind the issue. Therefore, we estimate production as the average between the information in Kalmanovitz et al. [1] and the information from the other sources [2,5,9]. Regarding the area, the missing values were obtained by assuming that average yields in 1915, 1925–1927, and 1932 (941 kg/h) remained constant during the period 1915–1932.

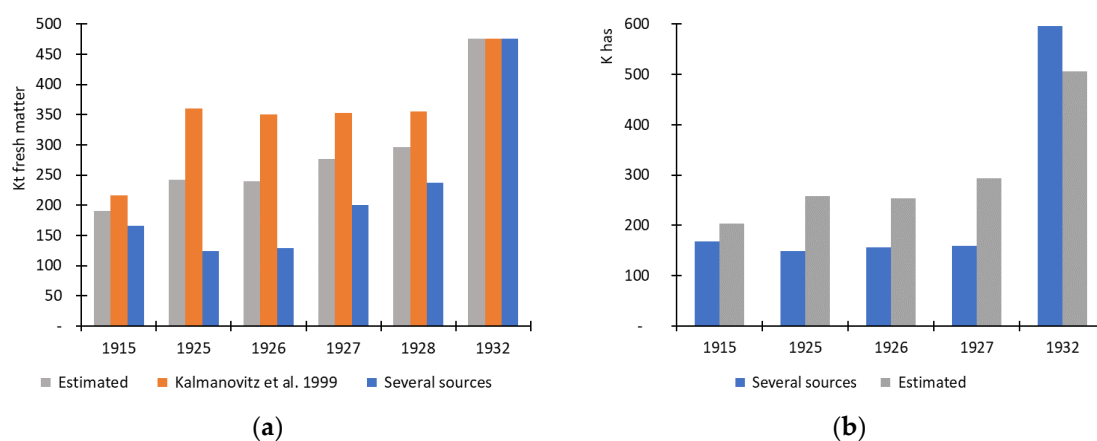

**Figure S1.** (a) Maize production in thousands of tonnes (Kt) of fresh matter from our estimation, Kalmanovitz et al. [1], and other sources [2,5,9]. (b) The area under maize in thousands of hectares (Khas) from several sources [2,5,9] and our estimation for 1915, 1925–1928, and 1932.

We did not use the series of Kalmanovitz et al. [1] or the area data from the other sources without adjustment since it entailed assuming an incredible rise in yields, a significant recovery of the area harvested after the food crisis in 1927, and a negation of the reduction in the area under basic grains. Instead of that, we have made a conservative estimation considering the limitations of yields during the period and allowing for the expansion of commercial crops (like coffee) over staple crops described by the historiography of the country [9–11].

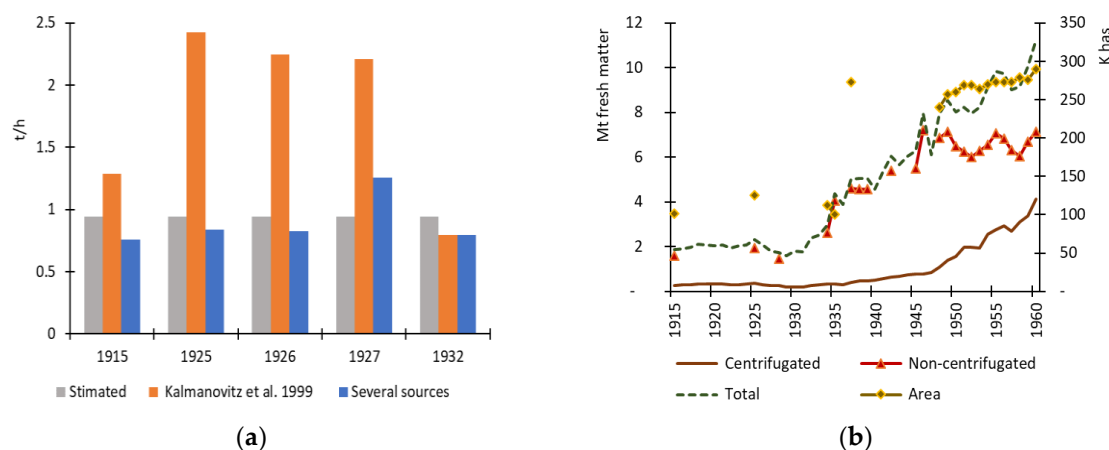

**Figure S2.** (a) Yields of maize in tonnes per hectare in fresh matter from Kalmanovitz et al. [1] and several sources [2,5,9] in 1915, 1925–1927, and 1932. (b) Centrifuged, non-centrifuged, and total sugarcane in millions of tonnes of fresh matter (left axis) and the area under sugarcane (right axis) in thousands of hectares (Khas) during 1915–1960.

## 2.2. Sugarcane

The data on sugar cane before 1961 is usually the amount of centrifuged sugar produced (Figure S2 (b)). non-centrifugated sugar and molasses, very relevant during the first half of the twentieth century, are not taken into account in the studies. We standardize the values before 1961 with the information in FAOSTAT. The yield of centrifuged, non-centrifuged sugar and molasses in the 1940s ranged between 10–11% of cut sugarcane [12] (p. 85), so we apply 0.1 to the data in Kalmanovitz et al. [1] and to the whole sugarcane production in several sources for 1915, 1925, 1928, 1934–1935, 1937–1939, 1942, 1945–1946, 1948–1950 [2,5,9,12–17]. For the years in between, we use the value of the ratio of centrifuged over non-centrifuged sugarcane. This ratio moved from 0.18 in 1915 to 0.58 in 1960, but during 1915–1950 the amount of centrifugated sugar remains almost constant (Figure S2 (b)). The average for 1915–1950 during the 1960s is 0.14 (sd. 0.05) Regarding the area, the missing values were estimated by linear interpolation. The values for 1934–35 were rejected as yields were closer to the mid-1960 than 1925 or 1937. Finally, the estimated average yield between 1941–1945 is 23 tonnes per hectare; very close to the yield of 27 tonnes per hectare in Cuba in 1945.

## 2.3. Coffee

Data for coffee production between 1915 and 1947 is from GRECO [18] These series shows the effect of the Great Depression and WWII better than Kalmanovitz et al. [1]. We used the data in Kalmanovitz et al. [1] for 1948–1950, as it is consistent with figures in Atkinson [13]. The latter was also used between 1950 and 1960. After 1960 the information comes from FAOSTAT, as usual [19]. Regarding the area in the 1915 Yearbook, there is no information for Caldas. The area under coffee in this source is 46,295 has. However, Caldas was the primary producer with a share of 30% of the total coffee production in the country. Due to its relevance, we estimated this area by applying the average yield of the other departments (830 kg/h). This leads to an area of 25,370 has, so the total national area under coffee in 1915 is 71,665 has (see table S1). There is information on area for 1925/27 [9,14], 1932/34 [15,16], 1946 [12], and 1948–1960 [13], and FAOSTAT as of 1961 [19]. The years in between were figured by linear interpolation.

**Table S1.** Coffee area and production in Colombia by departments 1915.

| Department   | Area (has)          | Production (kg) | Yields (kg/has)  |
|--------------|---------------------|-----------------|------------------|
| Antioquia    | 2416                | 1,777,988       | 736              |
| Atlántico    |                     |                 |                  |
| Bolívar      | 151                 | 85,075          | 563              |
| Boyacá       | 30                  | 18,742          | 625              |
| Caldas       | 25,370 <sup>1</sup> | 21,057,152      | 830 <sup>1</sup> |
| Cundinamarca | 15,517              | 20,060,475      | 1293             |
| Cauca        | 1781                | 760,660         | 427              |
| Huila        | 2175                | 821,874         | 378              |
| Magdalena    |                     |                 |                  |
| Nariño       | 443                 | 635,120         | 1434             |
| Santander N. | 10,515              | 13,476,400      | 1282             |
| Santander    | 4163                | 1,433,700       | 344              |
| Tolima       | 3500                | 3,677,670       | 1051             |
| Valle        | 5604                | 5,604,000       | 1000             |
| Total        | 71,665              | 69,408,856      |                  |

<sup>1</sup>The yield is the average yield of the other departments were used to calculate the area. Source: 1915 Yearbook and our calculation.

Regarding the yields, we observe a decreasing trend during the first half of the century from 930 kg/has in 1915 to 450 kg/has on average during IWW (Figure S3 (a)). This is read by Cárdenas et al. [20] as a weakening of the coffee economy that began after the Great Depression. They argue that after 1945 prices grew (Figure S3 (b)), but the area and the production did not. Plantations deteriorated, and the productivity per hectare fell to 1% [20]. However, our data on exportations and area does not fit well with this story.

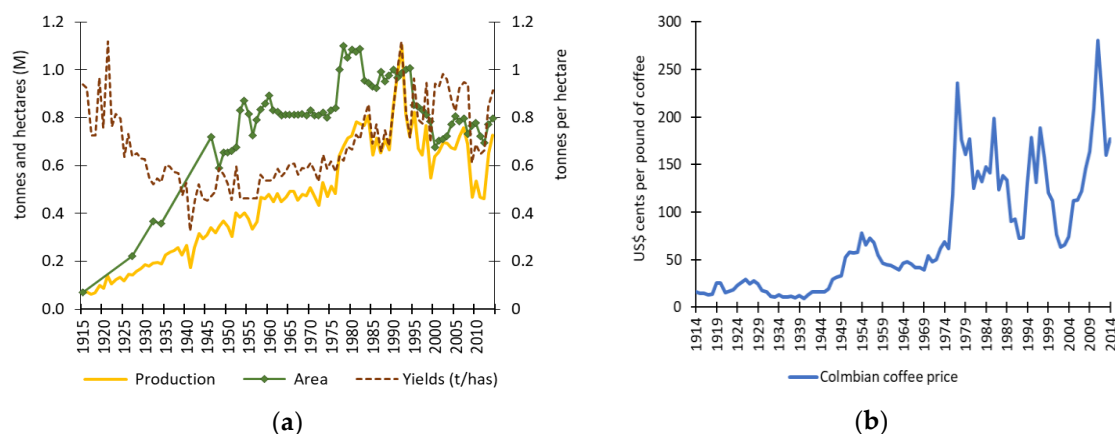

**Figure S3.** (a) Coffee production in millions of tonnes and its area in millions of hectares (left axis). Coffee yields in tonnes per hectare (right axis). (b) Colombian coffee prices in US\$ cents per pound of Excelso coffee (453.6 gr.). Sources: for the coffee area and production see the text. Excelso coffee prices are from the Federación de Cafeteros de Colombia [21].

Based on the series of GRECO, between 1915 and 1955 the production and the area under coffee, in physical terms, rose on average at 6% annually. Production increased four-fold and the area ten-fold. Coffee production grew from 67 Mt to 377. The area increased from 71 Khas in 1915 to 360 Khas in 1932/34 and to more than 800 Khas in 1955. After 1955 the expansion in production and area slowed down until the 1970s when the coffee production and the international prices rose again (Figure S3 (b)).

Our interpretation of the decline in yields is related to the expansion of the agrarian frontier, instead of the loss of dynamism in coffee production. The land ploughed for coffee expanded at 5%

annually until 1946, but the population growth in the coffee zone was slower. We gathered data for the population in Antioquia and Caldas for 1918, 1928, 1938, and 1951 to test this [22–25]. The average rate of growth of the population during these years was 2.5%. In the case of the rural population, the average growth rate was 1.6%, but only data for 1928, 1938, and 1951 is available. If we look at the evolution in Caldas, the most dynamic zone, population growth (3.1%) remained lower than the area expansion. The greater dynamism of the frontier expansion over the available labor could explain the decrease of the yields during the first half of the century. After 1955 the production grew slowly, while the area stabilized. This is partly related to advances in intensification during the 1960s. However, the increase in yields took off with the rise of international prices during the 1970s (Figure S3). The spread of new technologies (i.e., new species, management, and fertilizers) allowed to reduce the land devoted to cultivating coffee.

## 2. Sources for Conversion Factors

**Table S2.** Literature review for factors of harvest index, root-shoot ratio, weeds in traditional, low-input and conventional agricultural systems, and NPP for pastures and tropical forest.

| Harvest index and root-shoot ratio | Weeds                    |                         |                         | NPP                   |                         |
|------------------------------------|--------------------------|-------------------------|-------------------------|-----------------------|-------------------------|
|                                    | Traditional system       | Low-input system        | Conventional system     | Pastures              | Forest                  |
| Guzmán et al. [26]                 | Begna et al. [27]        | Bradshaw & Lanini [28]  | Begna et al. [27]       | Borda & Ramirez [29]  | Álvarez-Sánchez [30]    |
| Funes et al. [31]                  | Bradshaw & Lanini [28]   | Begna et al. [27]       | Bradshaw & Lanini [28]  | Moreno & Padilla [32] | Gómez & Gallopin [33]   |
| Kyle et al. [34]                   | Guzmán et al. [26]       | Guzmán et al. [26]      | Chauhan et al. [35]     | Padilla [36]          | Raich et al. [37]       |
| Madden et al. [38]                 | Khanthavong et al. [39]  | Khanthavong et al. [39] | Cheema et al. [40]      |                       | Scurlock and Olson [41] |
| Montero [42]                       | Liebman et al. [43]      | Liebman & Davis [43]    | Cierjacks et al. [44]   |                       |                         |
| Robinson et. al. [45]              | Marambe & Sangakara [46] | Liebman et al. [47]     | Guzmán et al. [26]      |                       |                         |
| Sethuraj [48]                      | Mohler & Liebman [49]    | Papamichail et al. [50] | Khanthavong et al. [39] |                       |                         |
|                                    | Papamichail et al. [50]  | Ryan et al. [51]        | Liebman & Davis [43]    |                       |                         |
|                                    | Ryan et al. [51]         | Tixier et al. [52]      | Liebman et al. [47]     |                       |                         |
|                                    | Tixier et al. [52]       | Wilson et al. [53]      | Mohler & Liebman [49]   |                       |                         |
|                                    | Wilson et al. [53]       |                         | Ryan et al. [51]        |                       |                         |
|                                    |                          |                         | Tixier et al. [52]      |                       |                         |
|                                    |                          |                         | Zafar et al. [54]       |                       |                         |

### 3. Crop Categories from FAO and Our Aggregations

**Table S3.** Crop categories and aggregations

| FAO categories            | Aggregation 1    | Aggregation 2 |
|---------------------------|------------------|---------------|
| Barley                    | Barley           | Cereals       |
| Buckwheat                 | Cereals, nes     | Cereals       |
| Canary seed               | Cereals, nes     | Cereals       |
| Cereals (Rice Milled Eqv) | Cereals, nes     | Cereals       |
| Cereals, nes              | Cereals, nes     | Cereals       |
| Cereals, Total            | Cereals, nes     | Cereals       |
| Coarse Grain, Total       | Cereals, nes     | Cereals       |
| Fonio                     | Cereals, nes     | Cereals       |
| Grain, mixed              | Cereals, nes     | Cereals       |
| Maize                     | Maize            | Cereals       |
| Millet                    | Cereals, nes     | Cereals       |
| Oats                      | Cereals, nes     | Cereals       |
| Quinoa                    | Cereals, nes     | Cereals       |
| Rice, paddy               | Rice, paddy      | Cereals       |
| Rye                       | Cereals, nes     | Cereals       |
| Sorghum                   | Cereals, nes     | Cereals       |
| Triticale                 | Cereals, nes     | Cereals       |
| Wheat                     | Wheat            | Cereals       |
| Agave fibres nes          | Agave fibres nes | Fibre Crops   |
| Bastfibres, other         | Fibre crops nes  | Fibre Crops   |
| Cotton lint               | Fibre crops nes  | Fibre Crops   |
| Fibre crops nes           | Fibre crops nes  | Fibre Crops   |
| Fibre Crops Primary       | Fibre crops nes  | Fibre Crops   |
| Flax fibre and tow        | Fibre crops nes  | Fibre Crops   |
| Hemp tow waste            | Fibre crops nes  | Fibre Crops   |
| Jute                      | Fibre crops nes  | Fibre Crops   |
| Kapok fibre               | Fibre crops nes  | Fibre Crops   |
| Manila fibre (abaca)      | Fibre crops nes  | Fibre Crops   |
| Ramie                     | Fibre crops nes  | Fibre Crops   |
| Rubber, natural           | Fibre crops nes  | Fibre Crops   |
| Sisal                     | Fibre crops nes  | Fibre Crops   |
| Almonds, with shell       | Fruits, other    | Fruits        |
| Apples                    | Fruits, other    | Fruits        |
| Apricots                  | Fruits, other    | Fruits        |
| Avocados                  | Fruits, other    | Fruits        |
| Bananas                   | Bananas          | Fruits        |
| Berries nes               | Fruits, other    | Fruits        |
| Blueberries               | Fruits, other    | Fruits        |
| Brazil nuts, with shell   | Fruits, other    | Fruits        |
| Carobs                    | Fruits, other    | Fruits        |
| Cashew nuts, with shell   | Fruits, other    | Fruits        |
| Cashewapple               | Fruits, other    | Fruits        |

|                                                 |                      |           |
|-------------------------------------------------|----------------------|-----------|
| Cherries                                        | Fruits, other        | Fruits    |
| Cherries, sour                                  | Fruits, other        | Fruits    |
| Chestnut                                        | Fruits, other        | Fruits    |
| Citrus Fruit,Total                              | Fruits, other        | Fruits    |
| Cranberries                                     | Fruits, other        | Fruits    |
| Currants                                        | Fruits, other        | Fruits    |
| Dates                                           | Fruits, other        | Fruits    |
| Figs                                            | Fruits, other        | Fruits    |
| Fruit Primary                                   | Fruits, other        | Fruits    |
| Fruit, citrus nes                               | Fruits, other        | Fruits    |
| Fruit, fresh nes                                | Fruits, other        | Fruits    |
| Fruit, pome nes                                 | Fruits, other        | Fruits    |
| Fruit, stone nes                                | Fruits, other        | Fruits    |
| Fruit, tropical fresh nes                       | Fruits, other        | Fruits    |
| Fruits, total                                   | Fruits, other        | Fruits    |
| Gooseberries                                    | Fruits, other        | Fruits    |
| Grapefruit (inc. pomelos)                       | Fruits, other        | Fruits    |
| Grapes                                          | Fruits, other        | Fruits    |
| Hazelnuts, with shell                           | Fruits, other        | Fruits    |
| Kapok fruit                                     | Fruits, other        | Fruits    |
| Kiwi fruit                                      | Fruits, other        | Fruits    |
| Kola nuts                                       | Fruits, other        | Fruits    |
| Lemons and limes                                | Fruits, other        | Fruits    |
| Mangoes, mangosteens, guavas                    | Fruits, other        | Fruits    |
| Nuts, nes                                       | Fruits, other        | Fruits    |
| Oranges                                         | Fruits, other        | Fruits    |
| Papayas                                         | Fruits, other        | Fruits    |
| Peaches and nectarines                          | Fruits, other        | Fruits    |
| Pears                                           | Fruits, other        | Fruits    |
| Persimmons                                      | Fruits, other        | Fruits    |
| Pineapples                                      | Fruits, other        | Fruits    |
| Pistachios                                      | Fruits, other        | Fruits    |
| Plantains and others                            | Plantains and others | Fruits    |
| Plums and sloes                                 | Fruits, other        | Fruits    |
| Quinces                                         | Fruits, other        | Fruits    |
| Raspberries                                     | Fruits, other        | Fruits    |
| Strawberries                                    | Fruits, other        | Fruits    |
| Tangerines, mandarins,<br>clementines, satsumas | Fruits, other        | Fruits    |
| Treenuts,Total                                  | Fruits, other        | Fruits    |
| Walnuts, with shell                             | Fruits, other        | Fruits    |
| Castor oil seed                                 | Oilcrops, Other      | Oil crops |
| Coconuts                                        | Coconuts             | Oil crops |
| Cottonseed                                      | Oilcrops, Other      | Oil crops |
| Groundnuts, with shell                          | Oilcrops, Other      | Oil crops |
| Hempseed                                        | Oilcrops, Other      | Oil crops |
| Jojoba seed                                     | Oilcrops, Other      | Oil crops |

---



|                               |                       |                      |
|-------------------------------|-----------------------|----------------------|
| Kapokseed in shell            | Oilcrops, Other       | Oil crops            |
| Karite nuts (sheanuts)        | Oilcrops, Other       | Oil crops            |
| Linseed                       | Oilcrops, Other       | Oil crops            |
| Melonseed                     | Oilcrops, Other       | Oil crops            |
| Mustard seed                  | Oilcrops, Other       | Oil crops            |
| Oil palm fruit                | Oilcrops, Other       | Oil crops            |
| Oil, palm                     | Oil, palm             | Oil crops            |
| Oilcrops, Cake Equivalent     | Oilcrops, Other       | Oil crops            |
| Oilcrops, Oil Equivalent      | Oilcrops, Other       | Oil crops            |
| Oilseeds nes                  | Oilcrops, Other       | Oil crops            |
| Olives                        | Oilcrops, Other       | Oil crops            |
| Palm kernels                  | Oilcrops, Other       | Oil crops            |
| Poppy seed                    | Oilcrops, Other       | Oil crops            |
| Rapeseed                      | Oilcrops, Other       | Oil crops            |
| Safflower seed                | Oilcrops, Other       | Oil crops            |
| Seed cotton                   | Seed cotton           | Oil crops            |
| Sesame seed                   | Oilcrops, Other       | Oil crops            |
| Sunflower seed                | Oilcrops, Other       | Oil crops            |
| Tallowtree seed               | Oilcrops, Other       | Oil crops            |
| Tung nuts                     | Oilcrops, Other       | Oil crops            |
| Areca nuts                    | Others                | Other plant products |
| Coir                          | Others                | Other plant products |
| Gums, natural                 | Others                | Other plant products |
| Hops                          | Others                | Other plant products |
| Máte                          | Others                | Other plant products |
| Others                        | Others                | Other plant products |
| Pyrethrum, dried              | Others                | Other plant products |
| Sugar crops, nes              | Others                | Other plant products |
| Tea                           | Others                | Other plant products |
| Bambara beans                 | Pulses, nes           | Pulses               |
| Beans, dry                    | Beans, dry            | Pulses               |
| Broad beans, horse beans, dry | Pulses, nes           | Pulses               |
| Chick peas                    | Pulses, nes           | Pulses               |
| Cow peas, dry                 | Pulses, nes           | Pulses               |
| Lentils                       | Pulses, nes           | Pulses               |
| Lupins                        | Pulses, nes           | Pulses               |
| Peas, dry                     | Pulses, nes           | Pulses               |
| Pigeon peas                   | Pulses, nes           | Pulses               |
| Pulses, nes                   | Pulses, nes           | Pulses               |
| Pulses,Total                  | Pulses, nes           | Pulses               |
| Soybeans                      | Pulses, nes           | Pulses               |
| Vetches                       | Pulses, nes           | Pulses               |
| Cassava                       | Cassava               | Roots and Tubers     |
| Cassava leaves                | Cassava               | Roots and Tubers     |
| Potatoes                      | Potatoes              | Roots and Tubers     |
| Roots and tubers, nes         | Roots and tubers, nes | Roots and Tubers     |
| Roots and Tubers,Total        | Roots and tubers, nes | Roots and Tubers     |

|                                    |                         |                    |
|------------------------------------|-------------------------|--------------------|
| Sweet potatoes                     | Roots and tubers, nes   | Roots and Tubers   |
| Taro (cocoyam)                     | Roots and tubers, nes   | Roots and Tubers   |
| Yams                               | Roots and tubers, nes   | Roots and Tubers   |
| Yams                               | Roots and tubers, nes   | Roots and Tubers   |
| Yautia (cocoyam)                   | Roots and tubers, nes   | Roots and Tubers   |
| Anise, badian, fennel, coriander   | Stimulants nes          | Stimulants         |
| Cinnamon (canella)                 | Stimulants nes          | Stimulants         |
| Cloves                             | Stimulants nes          | Stimulants         |
| Cocoa, beans                       | Cocoa, beans            | Stimulants         |
| Coffee, green                      | Coffee, green           | Stimulants         |
| Ginger                             | Stimulants nes          | Stimulants         |
| Nutmeg, mace and cardamoms         | Stimulants nes          | Stimulants         |
| Pepper (piper spp.)                | Stimulants nes          | Stimulants         |
| Peppermint                         | Stimulants nes          | Stimulants         |
| Spices, nes                        | Stimulants nes          | Stimulants         |
| Tobacco, unmanufactured            | Tobacco, unmanufactured | Stimulants         |
| Vanilla                            | Stimulants nes          | Stimulants         |
| Sugar beet                         | Sugar, Other            | Sugar & Sweeteners |
| Sugar cane                         | Sugar cane              | Sugar & Sweeteners |
| Artichokes                         | Vegetables, total       | Vegetables         |
| Asparagus                          | Vegetables, total       | Vegetables         |
| Beans, green                       | Vegetables, total       | Vegetables         |
| Cabbages and other brassicas       | Vegetables, total       | Vegetables         |
| Carrots and turnips                | Vegetables, total       | Vegetables         |
| Cauliflowers and broccoli          | Vegetables, total       | Vegetables         |
| Chicory roots                      | Vegetables, total       | Vegetables         |
| Chillies and peppers, dry          | Vegetables, total       | Vegetables         |
| Chillies and peppers, green        | Vegetables, total       | Vegetables         |
| Cucumbers and gherkins             | Vegetables, total       | Vegetables         |
| Eggplants (aubergines)             | Vegetables, total       | Vegetables         |
| Garlic                             | Vegetables, total       | Vegetables         |
| Leeks, other alliaceous vegetables | Vegetables, total       | Vegetables         |
| Lettuce and chicory                | Vegetables, total       | Vegetables         |
| Maize, green                       | Vegetables, total       | Vegetables         |
| Melons, other (inc. cantaloupes)   | Vegetables, total       | Vegetables         |
| Mushrooms and truffles             | Vegetables, total       | Vegetables         |
| Okra                               | Vegetables, total       | Vegetables         |
| Onions, dry                        | Vegetables, total       | Vegetables         |
| Onions, shallots, green            | Vegetables, total       | Vegetables         |
| Peas, green                        | Vegetables, total       | Vegetables         |
| Pumpkins, squash and gourds        | Vegetables, total       | Vegetables         |
| Spinach                            | Vegetables, total       | Vegetables         |
| String beans                       | Vegetables, total       | Vegetables         |
| Tomatoes                           | Vegetables, total       | Vegetables         |
| Vegetables Primary                 | Vegetables, total       | Vegetables         |
| Vegetables, fresh nes              | Vegetables, total       | Vegetables         |
| Vegetables, leguminous nes         | Vegetables, total       | Vegetables         |

|                   |                   |            |
|-------------------|-------------------|------------|
| Vegetables, total | Vegetables, total | Vegetables |
| Watermelons       | Vegetables, total | Vegetables |

Source: FAOSTAT and our aggregations

#### 4. Forest and Pasture Covers

##### 4.1. Forest

**Table S4.** Annual rates of change of the forest clearing by types of forest.

| Forest type   | 1915–1920 | 1920–1970 | 1970–2000 <sup>1</sup> |
|---------------|-----------|-----------|------------------------|
| Dry forest    | −0.43     | −0.75     | 0.16                   |
| Andean forest | −0.21     | −0.41     | −1.43                  |
| Rainforest    | −0.03     | −0.03     | −0.14                  |
| Total forest  | −0.08     | −0.12     | −0.49                  |

<sup>1</sup> We apply the same rate to dry, rain, and Andean forest between 2000 and 2015. Source: Source: Etter et al. [55].

##### 4.2. Pasture

**Table S5.** Pasture, cattle and cattle density

| Years | Pasture    | Cattle     | Density |
|-------|------------|------------|---------|
| 1950  | 13,437,000 | 10,714,246 | 0.80    |
| 1960  | 14,605,954 | 13,310,556 | 0.91    |
| 1970  | 17,464,571 | 16,391,916 | 0.94    |
| 1992  | 23,374,004 | 20,600,437 | 0.88    |
| 2015  | 24,094,072 | 22,527,783 | 0.93    |

Source: the series on cattle are from Kalmanovitz et al. (1915–1997) and FAOSTAT (1998–2015). Pasture for 1950 is from Varela [56] and 1960/70 from the national agrarian census [57,58]. As of 1992, there is annual data from UCL–CCI in FAOSTAT [19].

We use data from UCCL–CCI in FAOSTAT for pasture (16 Mhas) and shrubland (7.5 Mhas) during 1992–2015 to estimate the area devoted to pastureland for grassing since it fits well with the data in the 2014 agrarian census, and because the “permanent meadows and pastures” series from FAOSTAT is an aggregate category, which makes difficult the cattle density estimation. We are perhaps underestimating the series between 1961 and 1992 and overestimating it between 1992 and 2015 (Figure S4 (b)), however, the data is not conclusive among the sources.

The FAOSTAT series is almost constant between 1961 and 2015, 35 Mhas and 41 Mhas respectively (Figure S4 (a)). In the land cover map of 2010–2012, the addition of pastures (17.5 Mhas), grassland (14.5 Mhas), shrubland (2.5 Mhas), and secondary vegetation (4 Mhas) raises to 38.5 Mhas. Lastly, natural and seeded pastures in the 2014 census amount to 24.8 Mhas, but if we add shrubs (9.6), it reaches 34.4 Mhas. According to these data, the area under pastures and permanent meadows during 2010–2015 ranges between 34.4 and 41 Mhas, and the area for grassing must range between 17 Mhas (pasture) and 24 Mhas (when we add natural grassland for grassing). Our pastureland series match well with these values, but we cannot say the same for shrublands & other since it is our residue. The highest differences between our aggregate data and the FAOSTAT series reach 5% of the total land area, so, if the FAOSTAT series is right, there is some room to improve.

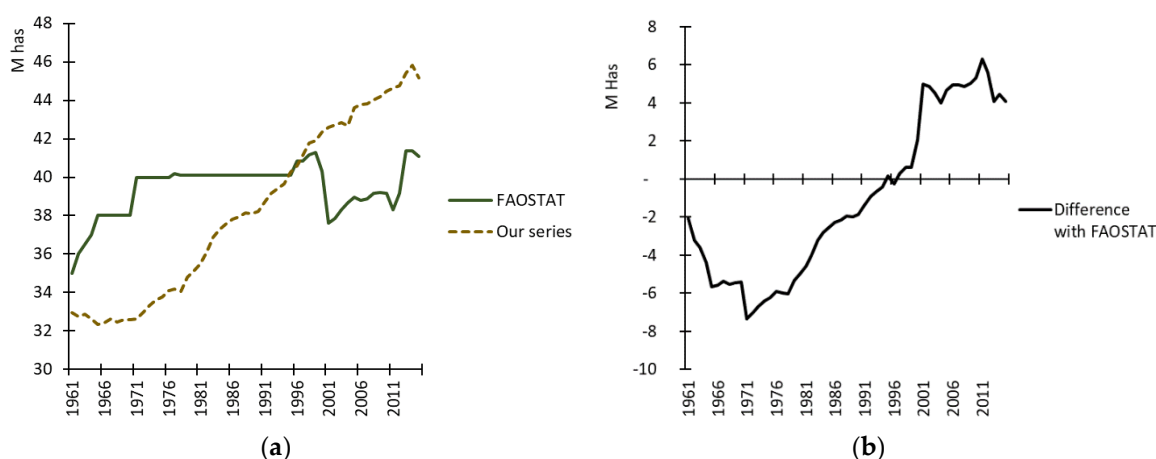

**Figure S4.** (a) Data for pasture and permanent meadows from FAOSTAT and our series of pasture and shrubland & others in millions of hectares and (b) The difference between the FAOSTAT series and our series in millions of hectares between 1961–2015.

## 5. Domestic Extraction of Pasture

### 5.1. Average Weight of Livestock

The average weight of livestock was estimated tracing the evolution of the most critical animal in pasture extraction: cattle. Additionally, we introduced some historical variation for other species when the data was available. The information on the average weight was compiled from the sources specified in the main text (see section 2.2 in the article). Besides, in the case of cattle, we have adjusted the average weight by accounting the age structure given by Kalmanovitz et al. [1].

**Table S6.** The evolution of the average weight by species in selected years in kg.

| Years | Cattle | Cattle by age | Pigs  | Sheep | Goats | Horses <sup>1</sup> | Mules <sup>1</sup> | Donkeys <sup>1</sup> |
|-------|--------|---------------|-------|-------|-------|---------------------|--------------------|----------------------|
| 1916  | 392.2  | 330.4         |       |       |       | 326.0               | 326.0              | 172.0                |
| 1918  | 448.0  | 368.9         | 70.0  | 37.0  | 24.0  |                     |                    |                      |
| 1923  | 364.9  | 312.4         |       |       |       |                     |                    |                      |
| 1938  | 412.2  | 342.5         | 81.8  |       |       |                     |                    |                      |
| 1942  | 430.0  | 352.1         |       |       |       |                     |                    |                      |
| 1945  | 431.3  | 349.9         |       |       |       |                     |                    |                      |
| 1950  | 382.0  | 316.9         | 90.0  | 32.0  | 26.0  |                     |                    |                      |
| 1965  | 367.5  | 300.5         |       |       |       |                     |                    |                      |
| 1969  | 384.0  | 311.0         |       |       |       |                     |                    |                      |
| 1980  | 445.0  | 342.4         |       |       |       |                     |                    |                      |
| 2010  | 419.5  | 324.5         | 99.4  | 37.6  | 30.0  | 405.7               | 319.8              | 319.8                |
| 2016  | 415.9  | 322.4         | 108.0 | 31.8  | 31.8  |                     |                    |                      |

<sup>1</sup> It is the average weight of horses, mules, and donkeys for 1860 and 1999 in Marco et al. [59]. Sources for the other species: see section 2.2 in the article.

### 5.2. Nutritional Requirements of Livestock

We use animal weight (Table S6) and nutritional requirements to obtain the feed intake (see section 2.1 in the article for sources). We use between 2.5% and 3% of body weight as a yardstick except in the case of pigs since the available information is a diet of corn and soybean [60]. In this case, we estimate a general dry matter equivalent by applying the gross calorific value (GCV) for Maize and legumes used as fodder in Guzmán et al. [26] and the average GCV in Csiro [61] (p. 5) for carbohydrates as cellulose (18.4 MJ/kg). The intake of the pigs as a percentage of the body weight thus obtained ranges between 2.5% and 2.2% for 1916–2016.

**Table S7.** Livestock feed intake for Colombia in selected years (kg dm per head/day)

| Years | Cattle | Cattle by age | Pigs | Sheep | Goat | Horses | Mules | Donkeys |
|-------|--------|---------------|------|-------|------|--------|-------|---------|
| 1916  | 10.8   | 9.1           |      |       |      | 8.97   | 9.78  | 5.16    |
| 1918  | 12.3   | 10.1          | 1.78 | 1.06  | 0.63 |        |       |         |
| 1923  | 10.0   | 8.6           |      |       |      |        |       |         |
| 1938  | 11.3   | 9.4           | 2.10 |       |      |        |       |         |
| 1942  | 11.8   | 9.7           |      |       |      |        |       |         |
| 1945  | 11.9   | 9.6           |      |       |      |        |       |         |
| 1950  | 10.5   | 8.7           | 2.10 | 0.92  | 0.68 |        |       |         |
| 1965  | 10.1   | 8.3           |      |       |      |        |       |         |
| 1969  | 10.6   | 8.6           |      |       |      |        |       |         |
| 1980  | 12.2   | 9.4           |      |       |      |        |       |         |
| 2010  | 11.5   | 8.9           | 2.34 | 1.08  | 0.78 | 11.16  | 9.59  | 9.59    |
| 2016  | 11.4   | 8.9           | 2.34 | 0.91  | 0.83 |        |       |         |

### 5.3. Sensitivity Analysis of Nutritional Requirement of Livestock and Biomass Extraction

The nutritional requirements of the animals were compared with the average feed intake for the Latin American given by Krausmann et al. [62]. This tests confirms the usefulness of our age adjustment for cattle (Figure S5 (b)). For other livestock, we found differences between using our data and using the values from Krausmann et al. [62]. The most relevant case is the difference in the nutritional requirements of pigs (Figure 5 (a)). The gap between the two series increases during the twentieth century despite that the dietary requirement as a percentage of the body weight decreases (see section 5.2). This is due to the exceptional increase in the average weight of pigs, that moved from 70 kg in 1918 to 108 kg in 2016 (Table S7). Moreover, this does not detract from our estimations, since the nutritional requirements of cattle constitute 80% of total needs and that for pigs, although growing since 2006, is less than 8%.

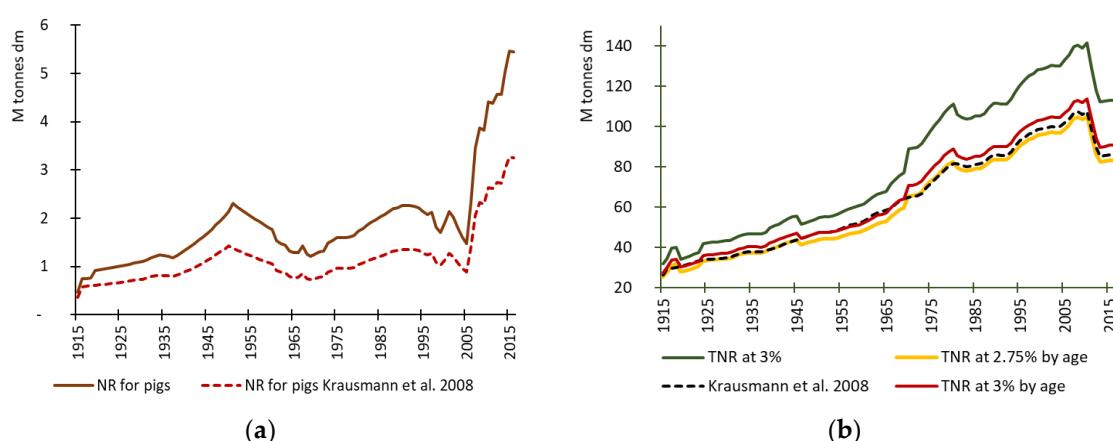

**Figure S5.** (a) Nutritional requirements (NR) for pigs. Our estimation and the series with the values from Krausmann et al. [62] (b) Total nutritional requirements (TNR) for livestock. Our series (at different percentages of the body weight of cattle and adjusted by age), and the series with the values from Krausmann et al. [62].

There are several series of biomass extraction in Colombia from 1970 until 2015 (Figure 6 (a)), but they are not entirely comparable with ours due to follow the MFA methodology. These series account for pasture in dry matter, while the rest of the biomass remains in fresh matter units (see section 2.1 in the article). The only comparable feature is the intensity of the biomass extraction (Figure 5 (b)). Our series shows lower growth, due to the water content. As we explain in section 3 of

the article, the biomass extracted from cropland has increased more within the cash crops with high water content than within the basic grains. This is the case of fruits, oil crops, and especially sugarcane, in which the water content amounts to more than 25 M tonnes, a fifth of the total dry matter accounted at the end of the period. A point in common among the series is the drop after 2006–08, driven by a shrinking in the cattle population.

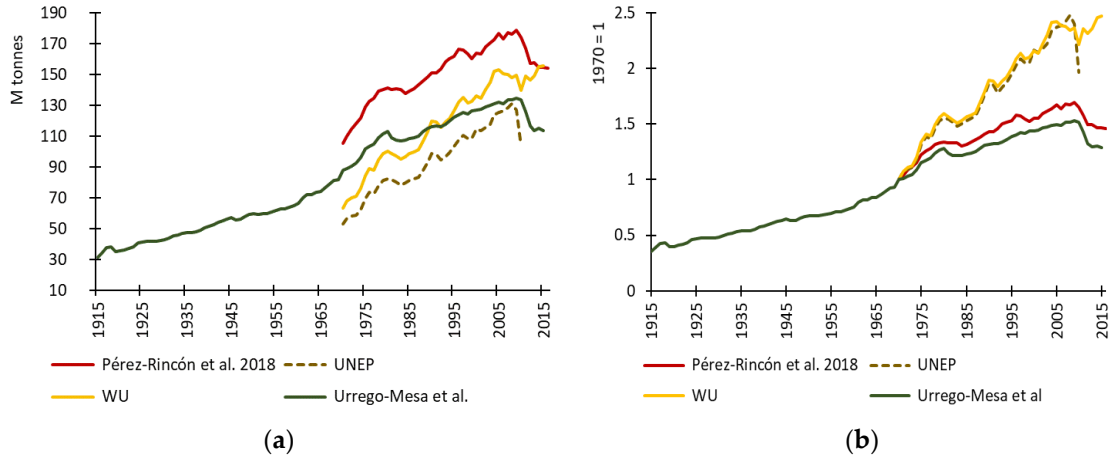

**Figure S6.** (a) Biomass extraction series in Colombia in millions of tonnes. Our series in dry matter and the others in a mix of dry and fresh matter. (b) Index numbers of the biomass extraction series 1970=1.

## 6. NPP series

Table S8. NPP series in millions of tonnes of dry matter (1915–2015)

| Years | Crops<br>[t DM] | Pastures<br>[t DM] | Shrubland & others<br>[t DM] | Dry forest<br>[t DM] | Andean forest<br>[t DM] | Rainforest<br>[t DM] | Other forest<br>[t DM] | Total NPP<br>[t DM] |
|-------|-----------------|--------------------|------------------------------|----------------------|-------------------------|----------------------|------------------------|---------------------|
| 1915  | 2.8             | 57.1               | 337.2                        | 15.4                 | 434.3                   | 968.7                | 211.9                  | 2027.5              |
| 1916  | 2.9             | 58.9               | 334.2                        | 15.3                 | 433.4                   | 968.4                | 211.9                  | 2025.1              |
| 1917  | 3.0             | 60.2               | 332.1                        | 15.3                 | 432.5                   | 968.1                | 211.9                  | 2023.2              |
| 1918  | 3.1             | 61.2               | 330.6                        | 15.2                 | 431.6                   | 967.8                | 211.9                  | 2021.6              |
| 1919  | 3.2             | 62.1               | 329.2                        | 15.1                 | 430.7                   | 967.6                | 212.0                  | 2019.9              |
| 1920  | 3.3             | 62.9               | 328.0                        | 15.1                 | 429.8                   | 967.3                | 212.0                  | 2018.3              |
| 1921  | 3.5             | 64.7               | 325.2                        | 14.9                 | 428.1                   | 967.0                | 212.2                  | 2015.6              |
| 1922  | 3.4             | 66.8               | 321.9                        | 14.8                 | 426.3                   | 966.7                | 212.5                  | 2012.4              |
| 1923  | 3.6             | 68.3               | 319.7                        | 14.7                 | 424.6                   | 966.4                | 212.7                  | 2009.9              |
| 1924  | 3.7             | 69.0               | 318.8                        | 14.6                 | 422.8                   | 966.1                | 213.0                  | 2008.0              |
| 1925  | 3.9             | 69.6               | 318.2                        | 14.5                 | 421.1                   | 965.8                | 213.2                  | 2006.3              |
| 1926  | 4.0             | 69.9               | 317.9                        | 14.4                 | 419.4                   | 965.5                | 213.4                  | 2004.7              |
| 1927  | 4.1             | 70.3               | 316.6                        | 14.3                 | 417.7                   | 965.2                | 213.7                  | 2002.0              |
| 1928  | 4.4             | 70.9               | 315.1                        | 14.2                 | 416.0                   | 964.9                | 213.9                  | 1999.4              |
| 1929  | 4.5             | 71.3               | 314.6                        | 14.1                 | 414.3                   | 964.7                | 214.1                  | 1997.5              |
| 1930  | 4.9             | 71.8               | 312.1                        | 14.0                 | 412.6                   | 964.4                | 214.3                  | 1994.1              |
| 1931  | 5.5             | 72.8               | 307.1                        | 13.9                 | 410.9                   | 964.1                | 214.5                  | 1988.8              |
| 1932  | 6.0             | 74.1               | 304.2                        | 13.8                 | 409.2                   | 963.8                | 214.7                  | 1985.8              |
| 1933  | 6.4             | 75.2               | 300.7                        | 13.7                 | 407.6                   | 963.5                | 214.9                  | 1981.9              |
| 1934  | 6.9             | 75.9               | 298.8                        | 13.6                 | 405.9                   | 963.2                | 215.1                  | 1979.4              |
| 1935  | 7.8             | 76.2               | 298.4                        | 13.5                 | 404.2                   | 962.9                | 215.3                  | 1978.4              |
| 1936  | 7.8             | 76.3               | 296.9                        | 13.4                 | 402.6                   | 962.6                | 215.5                  | 1975.1              |
| 1937  | 8.6             | 76.3               | 296.6                        | 13.3                 | 400.9                   | 962.3                | 215.7                  | 1973.8              |
| 1938  | 8.9             | 76.7               | 295.9                        | 13.2                 | 399.3                   | 962.1                | 215.9                  | 1971.8              |
| 1939  | 9.1             | 77.5               | 294.7                        | 13.1                 | 397.7                   | 961.8                | 216.0                  | 1969.9              |
| 1940  | 9.1             | 78.7               | 292.7                        | 13.0                 | 396.0                   | 961.5                | 216.2                  | 1967.2              |

|      |      |       |       |      |       |       |       |        |
|------|------|-------|-------|------|-------|-------|-------|--------|
| 1941 | 9.4  | 80.3  | 289.8 | 12.9 | 394.4 | 961.2 | 216.4 | 1964.4 |
| 1942 | 9.8  | 82.2  | 286.2 | 12.8 | 392.8 | 960.9 | 216.5 | 1961.2 |
| 1943 | 9.8  | 83.9  | 282.8 | 12.7 | 391.2 | 960.6 | 216.7 | 1957.6 |
| 1944 | 10.2 | 85.1  | 280.1 | 12.6 | 389.6 | 960.3 | 216.8 | 1954.8 |
| 1945 | 10.5 | 86.1  | 277.9 | 12.5 | 388.0 | 960.0 | 217.0 | 1952.0 |
| 1946 | 11.8 | 87.8  | 273.4 | 12.4 | 386.4 | 959.7 | 217.1 | 1948.8 |
| 1947 | 10.6 | 89.4  | 273.5 | 12.3 | 384.9 | 959.5 | 217.3 | 1947.5 |
| 1948 | 11.8 | 90.5  | 273.5 | 12.2 | 383.3 | 959.2 | 217.4 | 1947.9 |
| 1949 | 12.9 | 91.5  | 269.7 | 12.1 | 381.7 | 958.9 | 217.5 | 1944.5 |
| 1950 | 11.0 | 92.7  | 270.6 | 12.0 | 380.2 | 958.6 | 217.7 | 1942.7 |
| 1951 | 12.0 | 101.3 | 267.8 | 11.9 | 378.6 | 958.3 | 217.8 | 1947.7 |
| 1952 | 12.5 | 101.1 | 266.4 | 11.9 | 377.1 | 958.0 | 217.9 | 1945.0 |
| 1953 | 12.3 | 101.6 | 266.7 | 11.8 | 375.5 | 957.7 | 218.0 | 1943.6 |
| 1954 | 13.0 | 102.4 | 263.7 | 11.7 | 374.0 | 957.4 | 218.1 | 1940.4 |
| 1955 | 13.3 | 104.1 | 260.0 | 11.6 | 372.5 | 957.2 | 218.2 | 1936.9 |
| 1956 | 13.2 | 106.1 | 259.6 | 11.5 | 370.9 | 956.9 | 218.3 | 1936.6 |
| 1957 | 12.7 | 107.3 | 261.2 | 11.4 | 369.4 | 956.6 | 218.4 | 1937.1 |
| 1958 | 13.4 | 107.9 | 259.4 | 11.3 | 367.9 | 956.3 | 218.5 | 1934.7 |
| 1959 | 14.6 | 108.6 | 257.0 | 11.2 | 366.4 | 956.0 | 218.6 | 1932.4 |
| 1960 | 15.3 | 110.0 | 254.3 | 11.2 | 364.9 | 955.7 | 218.7 | 1930.1 |
| 1961 | 17.1 | 112.7 | 247.8 | 11.1 | 363.4 | 955.4 | 218.8 | 1926.3 |
| 1962 | 18.6 | 115.3 | 240.5 | 11.0 | 362.0 | 955.2 | 218.9 | 1921.3 |
| 1963 | 17.2 | 117.5 | 238.3 | 10.9 | 360.5 | 954.9 | 218.9 | 1918.2 |
| 1964 | 18.7 | 118.8 | 232.4 | 10.8 | 359.0 | 954.6 | 219.0 | 1913.3 |
| 1965 | 18.3 | 120.1 | 226.3 | 10.8 | 357.5 | 954.3 | 219.1 | 1906.2 |
| 1966 | 18.6 | 121.2 | 225.2 | 10.7 | 356.1 | 954.0 | 219.1 | 1904.9 |
| 1967 | 18.9 | 123.8 | 223.1 | 10.6 | 354.6 | 953.7 | 219.2 | 1904.0 |
| 1968 | 20.1 | 127.1 | 214.8 | 10.5 | 353.2 | 953.4 | 219.2 | 1898.3 |
| 1969 | 20.0 | 130.2 | 210.7 | 10.4 | 351.7 | 953.2 | 219.3 | 1895.5 |
| 1970 | 17.4 | 131.5 | 208.4 | 10.4 | 350.3 | 952.9 | 219.3 | 1890.1 |
| 1971 | 18.6 | 140.2 | 208.5 | 10.4 | 345.4 | 951.5 | 218.6 | 1893.2 |
| 1972 | 20.1 | 140.3 | 212.7 | 10.4 | 340.5 | 950.2 | 217.8 | 1892.1 |



|      |      |       |       |      |       |       |       |        |
|------|------|-------|-------|------|-------|-------|-------|--------|
| 1973 | 20.7 | 142.1 | 214.3 | 10.4 | 335.7 | 948.9 | 217.0 | 1889.1 |
| 1974 | 23.0 | 147.6 | 208.8 | 10.4 | 331.0 | 947.5 | 216.2 | 1884.6 |
| 1975 | 25.2 | 152.9 | 202.3 | 10.4 | 326.3 | 946.2 | 215.4 | 1878.7 |
| 1976 | 25.3 | 157.4 | 199.1 | 10.5 | 321.7 | 944.9 | 214.5 | 1873.4 |
| 1977 | 25.3 | 162.0 | 192.0 | 10.5 | 317.2 | 943.6 | 213.6 | 1864.1 |
| 1978 | 28.3 | 167.8 | 180.4 | 10.5 | 312.7 | 942.3 | 212.6 | 1854.5 |
| 1979 | 28.9 | 172.3 | 182.7 | 10.5 | 308.3 | 940.9 | 211.7 | 1855.3 |
| 1980 | 29.9 | 175.1 | 182.6 | 10.5 | 303.9 | 939.6 | 210.7 | 1852.3 |
| 1981 | 28.9 | 175.6 | 187.0 | 10.5 | 299.6 | 938.3 | 209.7 | 1849.7 |
| 1982 | 28.2 | 172.9 | 199.6 | 10.6 | 295.4 | 937.0 | 208.6 | 1852.3 |
| 1983 | 28.1 | 171.0 | 213.6 | 10.6 | 291.3 | 935.7 | 207.6 | 1857.9 |
| 1984 | 28.0 | 172.2 | 217.5 | 10.6 | 287.1 | 934.4 | 206.5 | 1856.4 |
| 1985 | 28.9 | 173.9 | 218.7 | 10.6 | 283.1 | 933.1 | 205.4 | 1853.7 |
| 1986 | 28.9 | 174.7 | 220.7 | 10.6 | 279.1 | 931.8 | 204.3 | 1850.0 |
| 1987 | 30.1 | 176.7 | 218.7 | 10.6 | 275.2 | 930.5 | 203.2 | 1845.0 |
| 1988 | 31.4 | 182.2 | 211.6 | 10.7 | 271.3 | 929.2 | 202.0 | 1838.3 |
| 1989 | 33.1 | 186.4 | 203.9 | 10.7 | 267.5 | 927.9 | 200.8 | 1830.3 |
| 1990 | 35.4 | 187.3 | 204.1 | 10.7 | 263.7 | 926.6 | 199.6 | 1827.4 |
| 1991 | 35.2 | 187.3 | 211.1 | 10.7 | 260.0 | 925.3 | 200.5 | 1830.1 |
| 1992 | 35.0 | 187.1 | 217.6 | 10.7 | 256.3 | 924.0 | 201.4 | 1832.2 |
| 1993 | 35.0 | 187.2 | 220.7 | 10.8 | 252.7 | 922.7 | 202.2 | 1831.3 |
| 1994 | 35.3 | 187.2 | 224.1 | 10.8 | 249.1 | 921.4 | 203.0 | 1831.0 |
| 1995 | 35.8 | 188.3 | 230.5 | 10.8 | 245.6 | 920.1 | 203.8 | 1834.9 |
| 1996 | 36.8 | 188.4 | 235.0 | 10.8 | 242.2 | 918.8 | 204.5 | 1836.5 |
| 1997 | 37.3 | 188.9 | 241.5 | 10.8 | 238.7 | 917.5 | 203.0 | 1837.7 |
| 1998 | 35.3 | 189.9 | 249.0 | 10.8 | 235.3 | 916.3 | 201.4 | 1838.0 |
| 1999 | 37.1 | 191.0 | 248.7 | 10.9 | 231.9 | 915.0 | 199.9 | 1834.5 |
| 2000 | 37.8 | 191.1 | 254.8 | 10.9 | 228.6 | 913.7 | 198.3 | 1835.1 |
| 2001 | 37.9 | 195.8 | 249.6 | 10.9 | 225.3 | 912.4 | 197.3 | 1829.3 |
| 2002 | 39.9 | 191.7 | 258.7 | 10.9 | 222.1 | 911.1 | 200.7 | 1835.0 |
| 2003 | 42.6 | 192.1 | 259.4 | 10.9 | 218.9 | 909.9 | 199.6 | 1833.4 |
| 2004 | 44.6 | 194.1 | 254.0 | 10.9 | 215.8 | 908.6 | 202.9 | 1831.0 |

|      |      |       |       |      |       |       |       |        |
|------|------|-------|-------|------|-------|-------|-------|--------|
| 2005 | 43.6 | 194.2 | 266.6 | 11.0 | 212.7 | 907.3 | 193.1 | 1828.4 |
| 2006 | 41.6 | 194.3 | 268.7 | 11.0 | 209.7 | 906.0 | 194.4 | 1825.6 |
| 2007 | 42.0 | 193.9 | 269.7 | 11.0 | 206.7 | 904.8 | 195.6 | 1823.7 |
| 2008 | 41.0 | 193.9 | 272.7 | 11.0 | 203.7 | 903.5 | 196.9 | 1822.8 |
| 2009 | 42.6 | 193.8 | 275.5 | 11.0 | 200.8 | 902.2 | 198.1 | 1824.1 |
| 2010 | 39.7 | 193.8 | 279.2 | 11.0 | 197.9 | 901.0 | 199.3 | 1821.9 |
| 2011 | 42.1 | 193.7 | 281.5 | 11.1 | 195.1 | 899.7 | 198.4 | 1821.6 |
| 2012 | 43.3 | 193.7 | 283.5 | 11.1 | 192.3 | 898.5 | 197.5 | 1819.9 |
| 2013 | 44.4 | 193.6 | 292.8 | 11.1 | 189.6 | 897.2 | 186.7 | 1815.3 |
| 2014 | 46.2 | 192.9 | 299.4 | 11.1 | 186.9 | 895.9 | 187.0 | 1819.4 |
| 2015 | 44.5 | 192.8 | 290.2 | 11.1 | 184.2 | 894.7 | 199.2 | 1816.8 |

## 7. Biomass Extraction and Biomass Use Series

Table S9. Biomass extraction and biomass use in millions of tonnes of dry matter

| Years | Extraction |           |          | Uses       |              |                 |                |                                | Total Extraction |
|-------|------------|-----------|----------|------------|--------------|-----------------|----------------|--------------------------------|------------------|
|       | Forestland | Grassland | Cropland | Cash Crops | Staple Crops | Wood & Fuelwood | Animal Feeding | Seeds & other Recycled Biomass |                  |
| 1915  | 5.0        | 24.9      | 1.5      | 0.5        | 0.4          | 5.0             | 25.2           | 0.3                            | 31.4             |
| 1916  | 5.1        | 27.4      | 1.5      | 0.6        | 0.4          | 5.1             | 27.8           | 0.3                            | 34.1             |
| 1917  | 5.2        | 30.7      | 1.6      | 0.6        | 0.4          | 5.2             | 31.0           | 0.3                            | 37.5             |
| 1918  | 5.3        | 31.1      | 1.7      | 0.6        | 0.4          | 5.3             | 31.5           | 0.3                            | 38.2             |
| 1919  | 5.4        | 27.6      | 1.7      | 0.6        | 0.5          | 5.4             | 28.0           | 0.3                            | 34.8             |
| 1920  | 5.6        | 28.0      | 1.7      | 0.6        | 0.5          | 5.6             | 28.3           | 0.3                            | 35.3             |
| 1921  | 5.7        | 28.7      | 1.8      | 0.6        | 0.5          | 5.7             | 29.1           | 0.3                            | 36.2             |
| 1922  | 5.8        | 29.5      | 1.8      | 0.6        | 0.5          | 5.8             | 29.9           | 0.3                            | 37.1             |
| 1923  | 5.9        | 30.1      | 1.9      | 0.6        | 0.6          | 5.9             | 30.5           | 0.4                            | 37.9             |
| 1924  | 6.0        | 32.9      | 1.9      | 0.6        | 0.6          | 6.0             | 33.3           | 0.4                            | 40.8             |
| 1925  | 6.1        | 33.2      | 2.1      | 0.7        | 0.6          | 6.1             | 33.6           | 0.4                            | 41.4             |
| 1926  | 6.3        | 33.3      | 2.1      | 0.6        | 0.7          | 6.3             | 33.7           | 0.4                            | 41.7             |
| 1927  | 6.4        | 33.5      | 2.0      | 0.5        | 0.7          | 6.4             | 33.9           | 0.4                            | 41.9             |
| 1928  | 6.0        | 33.7      | 2.1      | 0.5        | 0.8          | 6.0             | 34.1           | 0.4                            | 41.9             |

|      |      |      |     |     |     |      |      |     |      |
|------|------|------|-----|-----|-----|------|------|-----|------|
| 1929 | 6.1  | 33.9 | 2.1 | 0.5 | 0.8 | 6.1  | 34.3 | 0.4 | 42.1 |
| 1930 | 6.2  | 34.0 | 2.4 | 0.5 | 0.9 | 6.2  | 34.5 | 0.4 | 42.6 |
| 1931 | 6.4  | 34.7 | 2.6 | 0.5 | 1.0 | 6.4  | 35.3 | 0.5 | 43.7 |
| 1932 | 6.5  | 35.6 | 2.9 | 0.7 | 1.1 | 6.5  | 36.2 | 0.6 | 45.0 |
| 1933 | 6.6  | 36.2 | 3.1 | 0.7 | 1.1 | 6.6  | 36.8 | 0.6 | 45.9 |
| 1934 | 6.8  | 36.6 | 3.4 | 0.9 | 1.2 | 6.8  | 37.3 | 0.6 | 46.7 |
| 1935 | 6.9  | 36.5 | 4.1 | 1.3 | 1.2 | 6.9  | 37.3 | 0.8 | 47.4 |
| 1936 | 7.0  | 36.4 | 3.9 | 1.1 | 1.2 | 7.0  | 37.2 | 0.7 | 47.4 |
| 1937 | 7.2  | 36.2 | 4.4 | 1.5 | 1.3 | 7.2  | 37.1 | 0.8 | 47.8 |
| 1938 | 7.5  | 36.9 | 4.5 | 1.5 | 1.3 | 7.5  | 37.8 | 0.8 | 49.0 |
| 1939 | 7.7  | 38.2 | 4.7 | 1.5 | 1.4 | 7.7  | 39.2 | 0.9 | 50.6 |
| 1940 | 7.9  | 38.9 | 4.6 | 1.3 | 1.5 | 7.9  | 39.8 | 0.9 | 51.4 |
| 1941 | 8.1  | 39.7 | 4.8 | 1.6 | 1.4 | 8.1  | 40.7 | 0.9 | 52.6 |
| 1942 | 8.3  | 40.6 | 5.1 | 1.8 | 1.4 | 8.3  | 41.6 | 1.0 | 54.1 |
| 1943 | 8.5  | 41.3 | 5.0 | 1.7 | 1.4 | 8.5  | 42.3 | 0.9 | 54.9 |
| 1944 | 8.7  | 42.0 | 5.3 | 1.8 | 1.5 | 8.7  | 43.0 | 1.0 | 56.0 |
| 1945 | 8.9  | 42.5 | 5.5 | 1.8 | 1.5 | 8.9  | 43.6 | 1.0 | 56.9 |
| 1946 | 9.1  | 39.9 | 6.3 | 2.3 | 1.6 | 9.1  | 41.1 | 1.2 | 55.4 |
| 1947 | 9.4  | 40.9 | 5.6 | 1.8 | 1.6 | 9.4  | 42.0 | 1.0 | 55.8 |
| 1948 | 9.6  | 41.3 | 6.5 | 2.3 | 1.7 | 9.6  | 42.6 | 1.2 | 57.4 |
| 1949 | 9.8  | 41.8 | 7.3 | 2.5 | 2.0 | 9.8  | 43.2 | 1.4 | 58.9 |
| 1950 | 10.1 | 42.6 | 6.7 | 2.3 | 1.8 | 10.1 | 43.9 | 1.2 | 59.4 |
| 1951 | 9.2  | 42.7 | 7.4 | 2.4 | 2.1 | 9.2  | 44.1 | 1.4 | 59.2 |
| 1952 | 9.5  | 42.6 | 7.7 | 2.3 | 2.3 | 9.5  | 44.1 | 1.5 | 59.7 |
| 1953 | 9.6  | 42.8 | 7.5 | 2.4 | 2.2 | 9.6  | 44.3 | 1.4 | 59.9 |
| 1954 | 9.7  | 43.0 | 8.0 | 2.7 | 2.2 | 9.7  | 44.6 | 1.5 | 60.7 |
| 1955 | 9.8  | 43.7 | 8.2 | 2.9 | 2.2 | 9.8  | 45.3 | 1.5 | 61.6 |
| 1956 | 9.9  | 44.5 | 8.1 | 2.8 | 2.2 | 9.9  | 46.1 | 1.5 | 62.5 |
| 1957 | 10.0 | 45.1 | 7.8 | 2.6 | 2.2 | 10.0 | 46.6 | 1.5 | 62.8 |
| 1958 | 10.0 | 45.3 | 8.3 | 2.7 | 2.4 | 10.0 | 47.0 | 1.6 | 63.7 |
| 1959 | 10.1 | 45.6 | 9.1 | 2.9 | 2.7 | 10.1 | 47.4 | 1.7 | 64.9 |
| 1960 | 10.2 | 46.3 | 9.7 | 3.3 | 2.7 | 10.2 | 48.2 | 1.8 | 66.1 |

|      |      |      |      |     |     |      |      |     |       |
|------|------|------|------|-----|-----|------|------|-----|-------|
| 1961 | 12.1 | 46.9 | 11.1 | 4.0 | 2.5 | 12.1 | 49.3 | 2.2 | 70.0  |
| 1962 | 11.9 | 47.9 | 12.1 | 4.3 | 2.7 | 11.9 | 50.5 | 2.4 | 71.8  |
| 1963 | 11.9 | 49.2 | 11.0 | 3.8 | 2.6 | 11.9 | 51.6 | 2.2 | 72.1  |
| 1964 | 12.0 | 49.5 | 12.1 | 4.2 | 2.8 | 12.0 | 52.2 | 2.4 | 73.6  |
| 1965 | 12.1 | 50.3 | 11.6 | 3.8 | 2.8 | 12.1 | 52.9 | 2.3 | 73.9  |
| 1966 | 12.3 | 52.4 | 11.8 | 3.8 | 2.9 | 12.3 | 55.1 | 2.4 | 76.5  |
| 1967 | 12.4 | 54.0 | 12.1 | 3.9 | 3.0 | 12.4 | 56.8 | 2.4 | 78.6  |
| 1968 | 12.6 | 55.6 | 13.0 | 4.0 | 3.3 | 12.6 | 58.6 | 2.6 | 81.1  |
| 1969 | 12.6 | 56.3 | 12.9 | 4.0 | 3.3 | 12.6 | 59.4 | 2.6 | 81.8  |
| 1970 | 12.7 | 62.2 | 13.1 | 3.9 | 3.4 | 12.7 | 65.4 | 2.6 | 88.0  |
| 1971 | 12.8 | 61.8 | 14.0 | 4.1 | 3.3 | 12.8 | 65.5 | 2.8 | 88.6  |
| 1972 | 13.3 | 62.1 | 15.2 | 4.6 | 3.5 | 13.3 | 66.1 | 3.0 | 90.6  |
| 1973 | 13.5 | 63.3 | 15.6 | 4.8 | 3.5 | 13.5 | 67.5 | 3.1 | 92.3  |
| 1974 | 13.2 | 65.5 | 17.3 | 5.2 | 3.8 | 13.2 | 70.3 | 3.5 | 96.0  |
| 1975 | 15.0 | 67.4 | 19.1 | 6.2 | 3.8 | 15.0 | 72.7 | 3.8 | 101.5 |
| 1976 | 14.6 | 69.4 | 19.3 | 6.4 | 3.8 | 14.6 | 74.6 | 3.8 | 103.2 |
| 1977 | 14.4 | 71.3 | 19.3 | 6.3 | 4.0 | 14.4 | 76.5 | 3.8 | 104.9 |
| 1978 | 14.5 | 73.1 | 21.4 | 6.9 | 4.3 | 14.5 | 79.1 | 4.3 | 109.1 |
| 1979 | 14.3 | 75.1 | 22.1 | 7.5 | 4.3 | 14.3 | 81.1 | 4.4 | 111.4 |
| 1980 | 13.8 | 76.2 | 22.9 | 7.9 | 4.4 | 13.8 | 82.3 | 4.5 | 112.9 |
| 1981 | 13.7 | 73.0 | 22.0 | 7.1 | 4.5 | 13.7 | 79.2 | 4.4 | 108.8 |
| 1982 | 13.5 | 72.4 | 21.4 | 7.1 | 4.2 | 13.5 | 78.3 | 4.2 | 107.3 |
| 1983 | 13.5 | 71.8 | 21.5 | 7.4 | 4.2 | 13.5 | 77.5 | 4.2 | 106.8 |
| 1984 | 13.2 | 72.4 | 21.5 | 7.3 | 4.4 | 13.2 | 78.1 | 4.2 | 107.2 |
| 1985 | 13.1 | 73.2 | 22.2 | 7.9 | 4.2 | 13.1 | 78.9 | 4.3 | 108.5 |
| 1986 | 13.2 | 73.2 | 22.3 | 7.8 | 4.3 | 13.2 | 79.0 | 4.3 | 108.7 |
| 1987 | 13.1 | 73.8 | 23.1 | 7.9 | 4.6 | 13.1 | 80.0 | 4.6 | 110.0 |
| 1988 | 13.0 | 75.7 | 24.2 | 8.3 | 4.8 | 13.0 | 82.0 | 4.8 | 112.8 |
| 1989 | 12.8 | 76.9 | 25.3 | 8.5 | 5.1 | 12.8 | 83.6 | 5.0 | 115.1 |
| 1990 | 12.6 | 76.1 | 27.2 | 9.0 | 5.3 | 12.6 | 83.6 | 5.4 | 115.9 |
| 1991 | 12.9 | 76.1 | 27.3 | 9.1 | 5.5 | 12.9 | 83.3 | 5.4 | 116.3 |
| 1992 | 13.0 | 76.0 | 27.2 | 9.5 | 5.3 | 13.0 | 83.2 | 5.3 | 116.3 |

|      |      |      |      |      |     |      |       |     |       |
|------|------|------|------|------|-----|------|-------|-----|-------|
| 1993 | 12.4 | 78.0 | 27.2 | 9.9  | 5.0 | 12.4 | 85.0  | 5.2 | 117.6 |
| 1994 | 12.3 | 79.7 | 27.5 | 10.1 | 4.7 | 12.3 | 87.2  | 5.3 | 119.5 |
| 1995 | 11.9 | 82.3 | 27.9 | 10.4 | 4.8 | 11.9 | 89.7  | 5.3 | 122.1 |
| 1996 | 11.4 | 83.4 | 28.8 | 11.3 | 4.6 | 11.4 | 90.8  | 5.5 | 123.6 |
| 1997 | 10.9 | 85.0 | 29.2 | 11.7 | 4.6 | 10.9 | 92.4  | 5.5 | 125.1 |
| 1998 | 11.0 | 85.9 | 27.5 | 11.1 | 4.3 | 11.0 | 92.8  | 5.2 | 124.5 |
| 1999 | 10.5 | 87.0 | 28.8 | 11.2 | 4.8 | 10.5 | 94.4  | 5.4 | 126.4 |
| 2000 | 10.2 | 87.1 | 29.3 | 11.3 | 4.9 | 10.2 | 94.6  | 5.6 | 126.6 |
| 2001 | 9.8  | 87.9 | 29.5 | 11.3 | 5.0 | 9.8  | 95.5  | 5.5 | 127.1 |
| 2002 | 10.1 | 87.7 | 31.2 | 12.5 | 4.8 | 10.1 | 95.7  | 5.9 | 129.0 |
| 2003 | 10.2 | 86.5 | 33.3 | 13.0 | 5.2 | 10.2 | 95.2  | 6.3 | 129.9 |
| 2004 | 9.9  | 86.3 | 34.9 | 13.7 | 5.6 | 9.9  | 95.3  | 6.6 | 131.1 |
| 2005 | 9.7  | 88.0 | 34.2 | 13.6 | 5.3 | 9.7  | 96.8  | 6.5 | 131.8 |
| 2006 | 8.7  | 89.5 | 32.6 | 11.8 | 6.1 | 8.7  | 97.9  | 6.2 | 130.7 |
| 2007 | 8.1  | 92.6 | 32.8 | 11.3 | 6.9 | 8.1  | 101.0 | 6.2 | 133.5 |
| 2008 | 8.5  | 93.3 | 31.8 | 10.6 | 6.9 | 8.5  | 101.6 | 6.1 | 133.7 |
| 2009 | 9.2  | 92.0 | 33.3 | 11.6 | 6.9 | 9.2  | 100.4 | 6.4 | 134.5 |
| 2010 | 8.8  | 93.8 | 31.0 | 11.1 | 6.4 | 8.8  | 101.5 | 5.8 | 133.6 |
| 2011 | 8.8  | 84.3 | 32.9 | 12.0 | 6.7 | 8.8  | 92.3  | 6.2 | 126.0 |
| 2012 | 8.7  | 74.3 | 33.7 | 11.7 | 7.3 | 8.7  | 82.7  | 6.4 | 116.8 |
| 2013 | 8.8  | 70.2 | 34.7 | 12.4 | 7.4 | 8.8  | 78.6  | 6.5 | 113.7 |
| 2014 | 8.3  | 70.3 | 36.3 | 13.1 | 7.7 | 8.3  | 79.0  | 6.7 | 114.8 |
| 2015 | 8.0  | 71.0 | 34.6 | 13.6 | 6.7 | 8.0  | 79.2  | 6.2 | 113.6 |

---

**Author Contributions:** In writing the supplementary document A.U.-M. assembled the dataset and used the MEFA methodology to obtain the historical series. J.I.-A. and E.T. participated in supervising and revising the text. E.T. administered the research project and funding.

**Funding:** This research has been funded by the projects “Sustainable Farm Systems: Long-Term Socio-Ecological Metabolism in Western Agriculture” (Canadian Social Sciences and Humanities Research Council Partnership Grant 895-2011-1020), and “Sustainable Farm Systems and Transitions in Agricultural Metabolism” (Spanish Ministry of Science grant HAR2012-38920-C02-02) which has also funded the cost of this publication in Open Access.

**Conflicts of Interest:** “The authors declare no conflict of interest.”

## References and Notes

1. Kalmanovitz, S.; López, E.; Romero, C. A.; others *La producción Agropecuaria Colombiana 1915–1950*; Banco de la Republica de Colombia: Bogotá, Colombia, 1999;
2. *Anuario estadístico*; Colombia, D. G. de estadística, Ed.; 1915;
3. FAO *El estado mundial de la agricultura y la alimentación, 1948*; Organización de las Naciones Unidas para la Agricultura y la Alimentación, 1948;
4. Flórez Nieto, C. E.; Méndez, R. *Las transformaciones socio demográficas en Colombia durante el siglo XX.*; Tercer Mundo Editores, 2000;
5. Wylie, K. H. *The agriculture of Colombia*; U. S. Department of Agriculture, 1942;
6. Ecuador., D. N. de E. *Ecuador en cifras: 1938-1942*; Dirección Nacional de Estadística. Quito, Ecuador, 1944;
7. Cuba., M. de A. *Memoria del Censo agrícola nacional : 1946.*; P. Fernández: Habana, 1951;
8. United Nations., L. A. E. C. *El desarrollo económico del Ecuador*; Banco Central del Ecuador: Quito, 1953;
9. Bejarano, J. A. *Antología Jesús Antonio Bejarano*; Universidad Nacional de Colombia, Vicerrectoría Académica, Editorial, 2011;
10. Kalmanovitz, S.; López, E. *La agricultura colombiana en el siglo XX*; Fondo de Cultura económica: Mexico City, 2006;
11. Villaveces N., J.; Sánchez, F. Tendencias históricas y regionales de la adjudicación de baldíos en Colombia 1900-2012. In: Andes, U. de los, Ed.; Serie Documentos Cede, 2014.
12. Varela Martínez, R. *Boletín de la economía agrícola de Colombia*; Ministerio de Agricultura y Ganadería, Division de Economía Rural: Bogotá, 1949;
13. Atkinson, L. J. *Changes in Agricultural Production and Technology in Colombia*; United States Department of Agriculture, Economic Research Service, 1969;
14. Diot, J. Colombia económica 1923-1929. *Boletm Mensual de Estadísticas* **1976**, *300*, 120–245.
15. *Anuario estadístico*; Colombia, D. G. de estadística, Ed.; 1933;
16. *Anuario estadístico*; Colombia, D. G. de estadística, Ed.; 1934;
17. *Anuario estadístico*; Colombia, D. G. de estadística, Ed.; 1937;
18. GRECO *El desempeño macroeconómico colombiano - Series estadísticas (1905-1997)*; Banco de la República, 1999;
19. FAOSTAT Food and agriculture data 2018. Available online: <http://www.fao.org/faostat/en/> (Accessed on 07-11-2018)
20. Cárdenas, E.; Ocampo, J.; Thorp, R. *An Economic History of Twentieth-Century Latin America: Volume 3: Industrialization and the State in Latin America: The Postwar Years*; Springer, 2000;
21. Colombia, Federación Nacional de Cafeteros de Precio representativo del suave colombiano - mensual desde 1913. Available online: [https://www.federaciondefcafeteros.org/particulares/es/quienes\\_somos/119\\_estadisticas\\_historicas/](https://www.federaciondefcafeteros.org/particulares/es/quienes_somos/119_estadisticas_historicas/) (accessed on 12 December 2018)
22. Estadística, Contraloría. Dirección General de Censo de población de 1918; 1924;
23. Estadística, Contraloría. Dirección General de Censo de población de 1928; 1930;
24. Estadística, Contraloría. Dirección General de Censo de población de 1938; 1944;
25. DANE Censo de población de 1951; 1955;
26. Guzmán Casado, G.; Aguilera, E.; Soto Fernández, D.; Cid, A.; Infante Amate, J.; García Ruiz, R.; Herrera, A.; Villa, I.; Molina, M. González de; *Methodology and conversion factors to estimate the net primary productivity of historical and contemporary agroecosystems*. **2014**. Documentos de Trabajo de la Sociedad Española de Historia Agraria 1407.

27. Begna, S. H.; Hamilton, R. I.; Dwyer, L. M.; Stewart, D. W.; Cloutier, D.; Assemat, L.; Foroutan-Pour, K.; Smith, D. L. Weed Biomass Production Response to Plant Spacing and Corn (*Zea mays*) Hybrids Differing in Canopy Architecture. *Weed Technology* **2001**, *15*, 647–653, doi:10.1614/0890-037X(2001)015[0647:WBPRT]2.0.CO;2.
28. Bradshaw, L.; Lanini, W. T. Use of perennial cover crops to suppress weeds in Nicaraguan coffee orchards. *International Journal of Pest Management* **1995**, *41*, 185–194, doi:10.1080/09670879509371947.
29. Borda, V. H.; Ramírez Nader, L. M. Disponibilidad forrajera en pasturas renovadas de Kikuyo, *Pennisetum clandestinum* Hoechst, con un equipo renovador para tracción animal. Región alto andina de Barragán, Tuluá, Valle del Cauca, Colombia. *Acta Agronómica* **2003**, *52*, 77–83, doi:10.15446/acag.
30. Álvarez-Sánchez, F. J. Productividad primaria neta en una selva tropical húmeda. *Boletín de la Sociedad Botánica de México* **1991**, *51*, 3–12, doi:10.17129/botsci.1393.
31. Funes, R.; Villa, I.; Aguilera, E. Trajectories of Socio-ecological Transition in a Caribbean agriculture. The case of Cuba during the twentieth century. In *European Society for Environmental History Conference*; Zagreb, Croatia, 2017.
32. Moreno Durango, O.; Padilla Valle, H. *Evaluación de cuatro gramíneas tropicales para la producción de leche*; Acta Agronómica, 1972, 22 (3–4), 163–183.
33. Gómez, I.; Gallopin, G. Estimación de la productividad primaria neta de ecosistemas terrestres del mundo en relación a factores ambientales. *Ecología Austral* **1991**, *1*, 24–40.
34. Kyle, G. P.; Luckow, P.; Calvin, K. V.; Emanuel, W. R.; Nathan, M.; Zhou, Y. GCAM 3.0 Agriculture and Land Use: Data Sources and Methods. **2011**, doi:10.2172/1036082.
35. Chauhan, B. S.; Johnson, D. E. Row spacing and weed control timing affect yield of aerobic rice. *Field Crops Research* **2011**, *121*, 226–231, doi:https://doi.org/10.1016/j.fcr.2010.12.008.
36. Padilla Quintero, A. *Estimación de la productividad primaria neta aérea (PPNA) del forraje de pastos para los sistemas de producción ganadera mediante sensores remotos*; Universidad del Valle: Cali, Colombia, 2017.
37. Raich, J. W.; Rastetter, E. B.; Melillo, J. M.; Kicklighter, D. W.; Steudler, P. A.; Peterson, B. J.; Grace, A. L.; Moore III, B.; Vorosmarty, C. J. Potential net primary productivity in South America: application of a global model. *Ecological Applications* **1991**, *1*, 399–429, doi:10.2307/1941899.
38. Madden, R.; Darby, H. Hops Harvest Moisture Determination 2012.
39. Khanthavong, P.; Oudthachit, S.; Souvannalat, A.; Matsumoto, N. Effect of weed biomass on cassava yield related to weeding times. *Plants & Agriculture Research* **2016**, *5*, 630–632, doi:10.15406/apar.2016.05.00194.
40. Cheema, Z.; Khaliq, A.; Tariq, M. Evaluation of concentrated sorgaab alone and in combination with reduced rates of three preemergence herbicides for weed control in cotton (*Gossypium hirsutum* L.). *Int. J. Agric. Biol* **2002**, *4*, 549–552.
41. Scurlock, J. M. O.; Olson, R. J. NPP Multi-Biome: Grassland, Boreal Forest, and Tropical Forest Sites, 1939–1996, R1. *ORNL DAAC* **2013**, doi:doi:10.3334/ORNLDAAC/653.
42. Montero, A. *Café, Revolución Verde, Regulación y liberación del mercado: Costa Rica (1950–2017)*, Universitat de Barcelona, 2018.
43. Liebman; Davis Integration of soil, crop and weed management in low-external-input farming systems. *Weed Research* **2000**, *40*, 27–47, doi:10.1046/j.1365-3180.2000.00164.x.
44. Cierjacks, A.; Pommeranz, M.; Schulz, K.; Almeida-Cortez, J. Is crop yield related to weed species diversity and biomass in coconut and banana fields of northeastern Brazil? *Agriculture, Ecosystems & Environment* **2016**, *220*, 175–183, doi:https://doi.org/10.1016/j.agee.2016.01.006.
45. Robinson, N. P.; Cox, C. M.; Koo, J. *Harnessing net primary productivity data for monitoring sustainable development of agriculture*; International Food Policy Research Institute, 2016; Vol. 1584;
46. Marambe, B.; Sangakkara, U. Effect of EM on weed populations, weed growth and tomato production in Kyusei nature farming. *Peradeniya, Sri Lanka, Universidad de Peradeniya* **1995**.
47. Liebman, M.; Bastiaans, L.; Baumann, D. T. Weed Management in Low-External-Input and Organic Farming Systems. In *Weed Biology and Management*; Inderjit, Ed.; Springer Netherlands: Dordrecht, 2004; pp. 285–315.
48. Sethuraj, M. R. Yield components in *Hevea brasiliensis*— theoretical considerations. *Plant, Cell & Environment* **1981**, *4*, 81–83, doi:10.1111/j.1365-3040.1981.tb00838.x.
49. Mohler, C. L.; Liebman, M. Weed Productivity and Composition in Sole Crops and Intercrops of Barley and Field Pea. *Journal of Applied Ecology* **1987**, *24*, 685–699.

50. Papamichail, D.; Eleftherohorinos, I.; Froud-Williams, R.; Gravanis, F. Critical periods of weed competition in cotton in Greece. *Phytoparasitica* **2002**, *30*, 105–111.
51. Ryan, M. R.; Mortensen, D. A.; Bastiaans, L.; Teasdale, J. R.; Mirsky, S. B.; Curran, W. S.; Seidel, R.; Wilson, D. O.; Hepperly, P. R. Elucidating the apparent maize tolerance to weed competition in long-term organically managed systems. *Weed Research* **2010**, *50*, 25–36, doi:10.1111/j.1365-3180.2009.00750.x.
52. Tixier, P.; Lavigne, C.; Alvarez, S.; Gauquier, A.; Blanchard, M.; Ripoché, A.; Achard, R. Model evaluation of cover crops, application to eleven species for banana cropping systems. *European Journal of Agronomy* **2011**, *34*, 53–61, doi:https://doi.org/10.1016/j.eja.2010.10.004.
53. Wilson, B. J.; Wright, K. J.; Brain, P.; Clements, M.; Stephens, E. Predicting the competitive effects of weed and crop density on weed biomass, weed seed production and crop yield in wheat. *Weed Research* **1995**, *35*, 265–278, doi:10.1111/j.1365-3180.1995.tb01789.x.
54. Zafar, M.; Tanveer, A.; Cheema, Z. A.; Ashraf, M. Weed-crop competition effects on growth and yield of sugarcane planted using two methods. *Pakistan Journal of Botany* **2010**, *42*, 815–823.
55. Etter, A.; McAlpine, C.; Possingham, H. Historical Patterns and Drivers of Landscape Change in Colombia Since 1500: A Regionalized Spatial Approach. *Annals of the Association of American Geographers* **2008**, *98*, 2–23, doi:10.1080/00045600701733911.
56. Varela Martínez, R.; Valle, G. Palacio del; Cañón, J.; Ramírez, E. *Economía agropecuaria de Colombia en 1950*; Ministerio de Agricultura: Bogotá, 1952;
57. DANE *Censo agropecuario 1960*; DANE, Ed.: Bogotá, Colombia, 1964;
58. DANE *Censo nacional agropecuario 1970-71*; DANE, Ed.: Bogotá, Colombia, 1974;
59. Marco, I.; Padró, R.; Cattaneo, C.; Caravaca, J.; Tello, E. From vineyards to feedlots: a fund-flow scanning of sociometabolic transition in the Vallès County (Catalonia) 1860–1956–1999. *Regional Environmental Change* 1–13.
60. *Nutrient requirements of swine*; National Research Council, Ed.; National Academies Press, 1998;
61. CSIRO *Nutrient requirements of domesticated ruminants*; CSIRO publishing, 2007;
62. Krausmann, F.; Erb, K.-H.; Gingrich, S.; Lauk, C.; Haberl, H. Global patterns of socioeconomic biomass flows in the year 2000: A comprehensive assessment of supply, consumption and constraints. *Ecological Economics* **2008**, *65*, 471–487, doi:10.1016/j.ecolecon.2007.07.012.

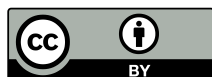

© 2018 by the authors. Submitted for possible open access publication under the terms and conditions of the Creative Commons Attribution (CC BY) license (<http://creativecommons.org/licenses/by/4.0/>).
